# Supplementary material for: Mitochondrial Utilization of Competing Fuels Is Altered in Insulin Resistant Skeletal Muscle of Non-obese Rats (Goto-Kakizaki)
Source: Front Physiol. 2020 Jun 16;11:677. doi: 10.3389/fphys.2020.00677 (PMC7308651; doi:10.3389/fphys.2020.00677)
Supplement: Supplementary file 1 [file Presentation_1.pdf]

## Supplementary Material

## Supplementary Figures

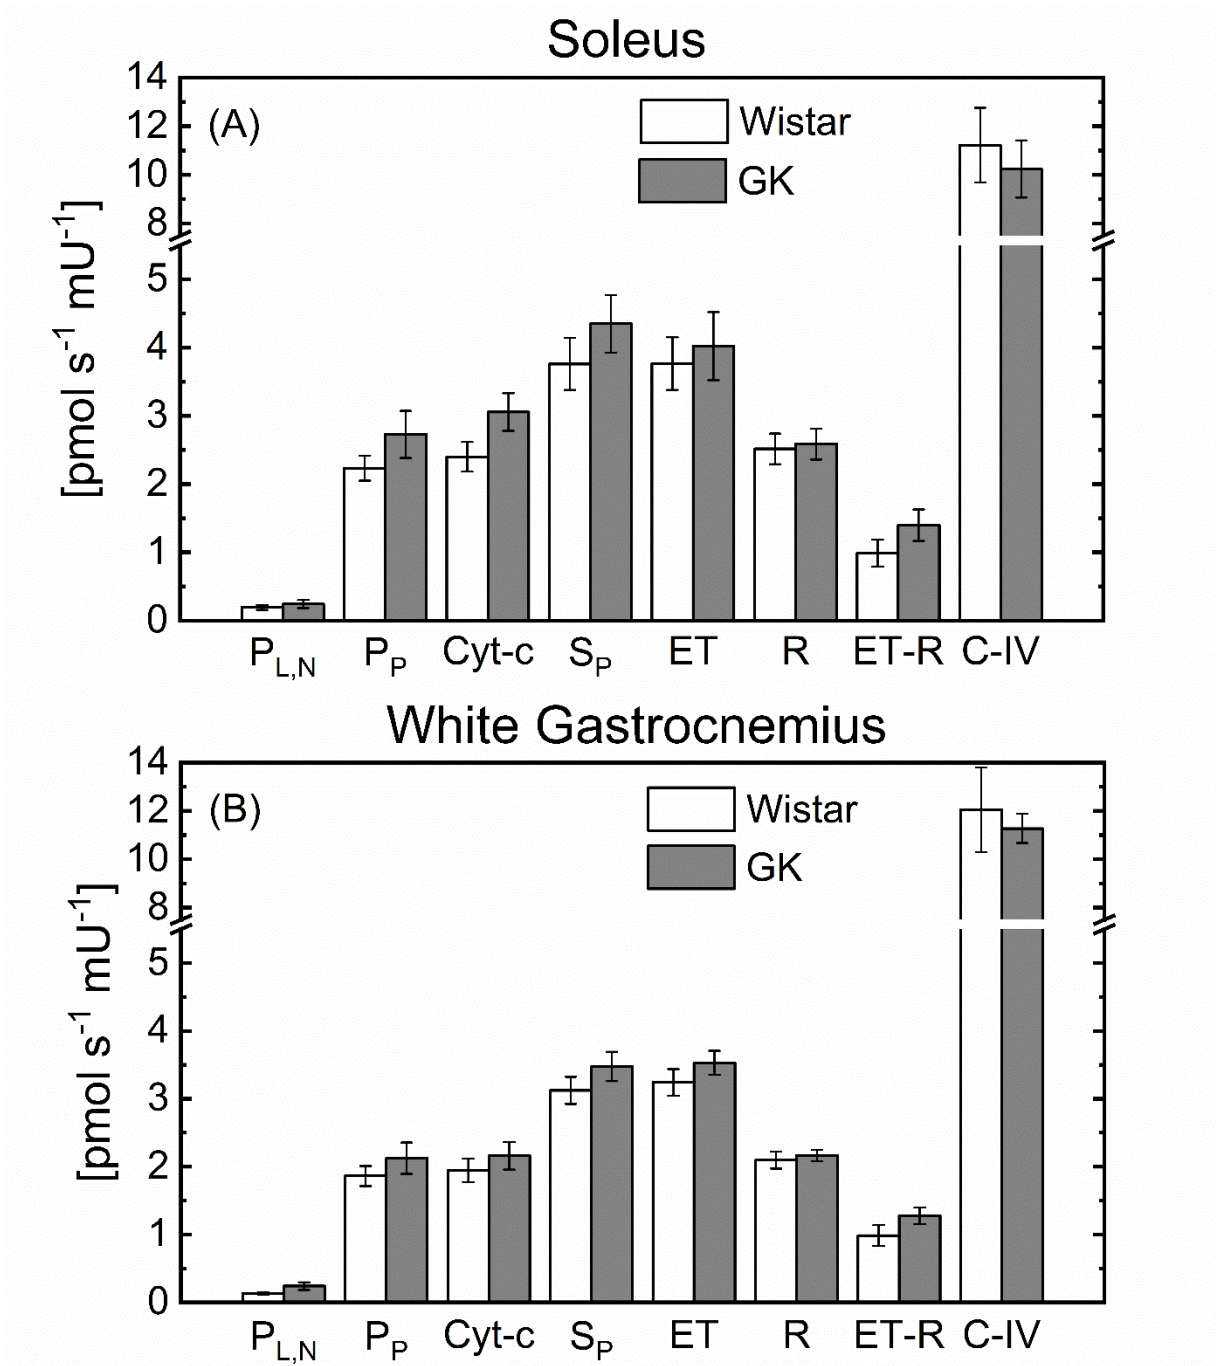

**Supplementary Figure 1.** Respiration rates normalized to citrate synthase activity in permeabilized soleus (A) and white gastrocnemius (B) of control and GK rats obtained under leak (P<sub>L,N</sub>) and oxphos state (P<sub>P</sub>) with malate and pyruvate, cytochrome c (Cyt-c), Succinate (S<sub>P</sub>), uncoupled mitochondria to measure maximal electron transport chain capacity (ET), rotenone (R). Also, ET-R indicates the respiration rate difference between that indicated with ET and R; CIV indicates the respiration rate difference between that with ascorbate plus TMPD and azide. Data are mean ± SEM (n=6).

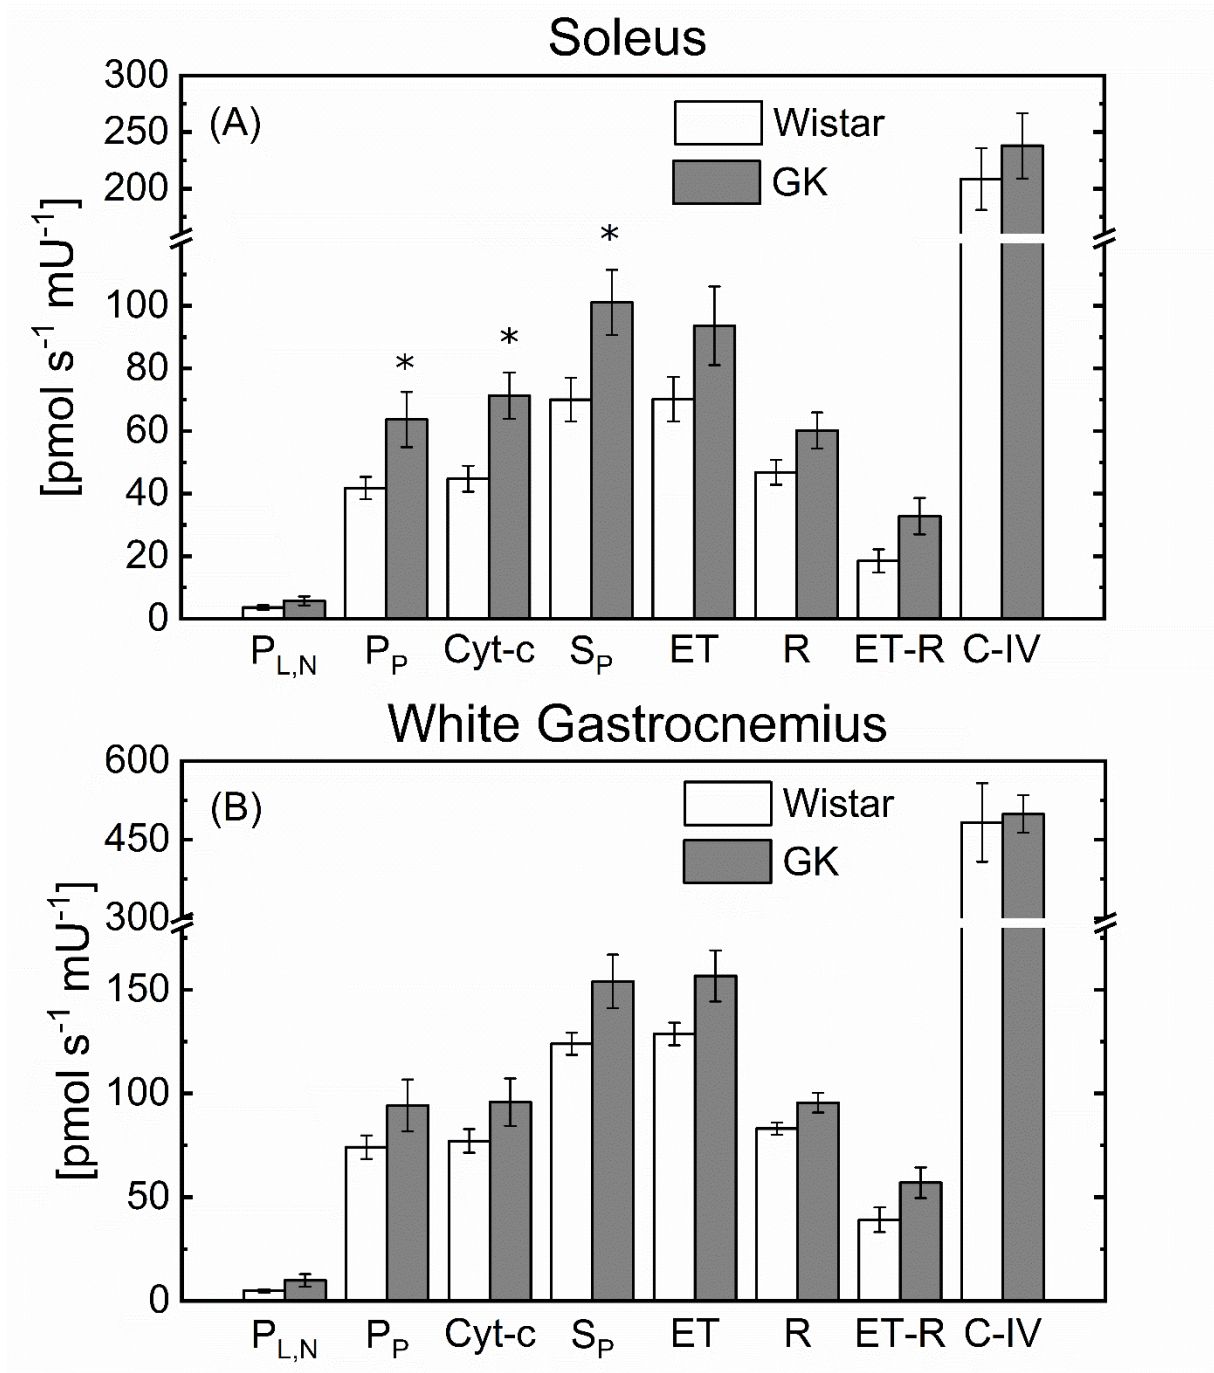

**Supplementary Figure 2.** Respiration rates normalized to succinate dehydrogenase activity in permeabilized soleus (A) and white gastrocnemius (B) muscles of control and GK rats obtained under leak state ( $P_{L,N}$ ) and oxphos state ( $P_P$ ) with malate and pyruvate, cytochrome c (Cyt-c), Succinate ( $S_P$ ), uncoupled mitochondria to measure maximal electron transport chain capacity (ET), rotenone (R). Also, ET-R indicates the respiration rate difference between that indicated with ET and R; CIV indicates the respiration rate difference between that with ascorbate plus TMPD and azide. (\*) Statistically different from control. Data are mean  $\pm$  SEM (n=6).
